# Supplementary material for: Structural and dynamical properties of thermoplastic polyurethane/fullerene nanocomposites: a molecular dynamics simulations study
Source: Royal Society of Chemistry journal article supplement (doi:10.1039/d3cp03809b), 2023-01-01
Supplement: d3cp03809b1.pdf [file d3cp03809b1.pdf]

# Supporting Information

## Structural and Dynamical Properties of Thermoplastic

### Polyurethane/Fullerene Nanocomposites: A Molecular Dynamics

#### Simulations Study

Jianxiang Shen,<sup>†,‡,¶</sup> Xue Li,<sup>\*,§</sup> Ping Li,<sup>¶</sup> and Baoqing Shentu<sup>\*,†</sup>

<sup>†</sup>*State Key Lab of Chemical Engineering, College of Chemical and Biological Engineering,  
Zhejiang University, Hangzhou 310027, UK*

<sup>‡</sup>*Department of Polymer Science and Technology, Jiaxing University, Jiaxing 314001, UK*

<sup>¶</sup>*Zhejiang Double Arrow Rubber Co., Ltd., Tongxiang 314513, UK*

<sup>§</sup>*School of Advanced Materials Engineering, Jiaxing Nanhu University, Jiaxing 314001, UK*

E-mail: [lixue@jxnhu.edu.uk](mailto:lixue@jxnhu.edu.uk); [shentu@zju.edu.uk](mailto:shentu@zju.edu.uk)

Number of Pages: 9

Number of Figures: 9

Number of Tables: 1

# Contents

Figure S1. Finite size effect examined: (a) snapshots of simulation systems with smaller size ( $L \approx 4.6nm$ ) and larger size ( $L \approx 9.2nm$ ), (b) radius of gyration ( $\langle R_g \rangle$ ) as a function of  $C_{60}$  wt% for the smaller and larger simulation systems, (c) translational diffusion coefficient ( $D_T$ ) as a function of  $C_{60}$  wt% influenced by simulation size.

Figure S2. Changes in (a) density of TPU/ $C_{60}$  composites and (b) potential energy during the first 200 ps of NPT run ( $P=0.1$  MPa,  $T=380$  K).

Figure S3. Radius of gyration ( $R_g$ ) of TPU chain as a function of simulation time ( $P=0.1$  MPa,  $T=400$  K). The theoretical value of  $R_g$  is given by the dashed line.

Figure S4. Determination of glass transition temperature  $T_g$  by changes in (a) specific volume ( $\nu$ ) and (b) non-bond energy ( $E_{\text{non-bond}}$ ) versus temperature ( $T$ ).

Figure S5. Specific volume ( $\nu$ ) under NPT equilibrium and during cooling, as a function of temperature ( $T$ ). Glass transition temperature ( $T_g$ ) measured using cooling is significantly higher compared to simulation technique of NPT equilibrium.

Figure S6. Comparison of glass transition temperature increment ( $\Delta T_g$ ) from current MD simulation study and literature experiments. References listed below. Polymer/ $C_{60}$  composite details shown in Table S1.

Figure S7. (a) Mean squared displacement (MSD( $t$ )) versus time  $t$  for neat TPU. (b) MSD( $t$ ) for TPUs with varying wt% of  $C_{60}$  at 400K.

Figure S8. Time decay of orientational autocorrelation function  $C(t)$  for bond vector of simulated TPU chains ( $P=0.1$  MPa,  $T=400$  K).

Figure S9. (a) Time dependence of radius of gyration ( $R_g$ ) of TPU chains within intermediate to long-time range. (b) Averaged radius of gyration ( $\langle R_g \rangle$ ) as a function of  $C_{60}$  wt%.

Table S1. Polymer/ $C_{60}$  composite systems in literature experiments.

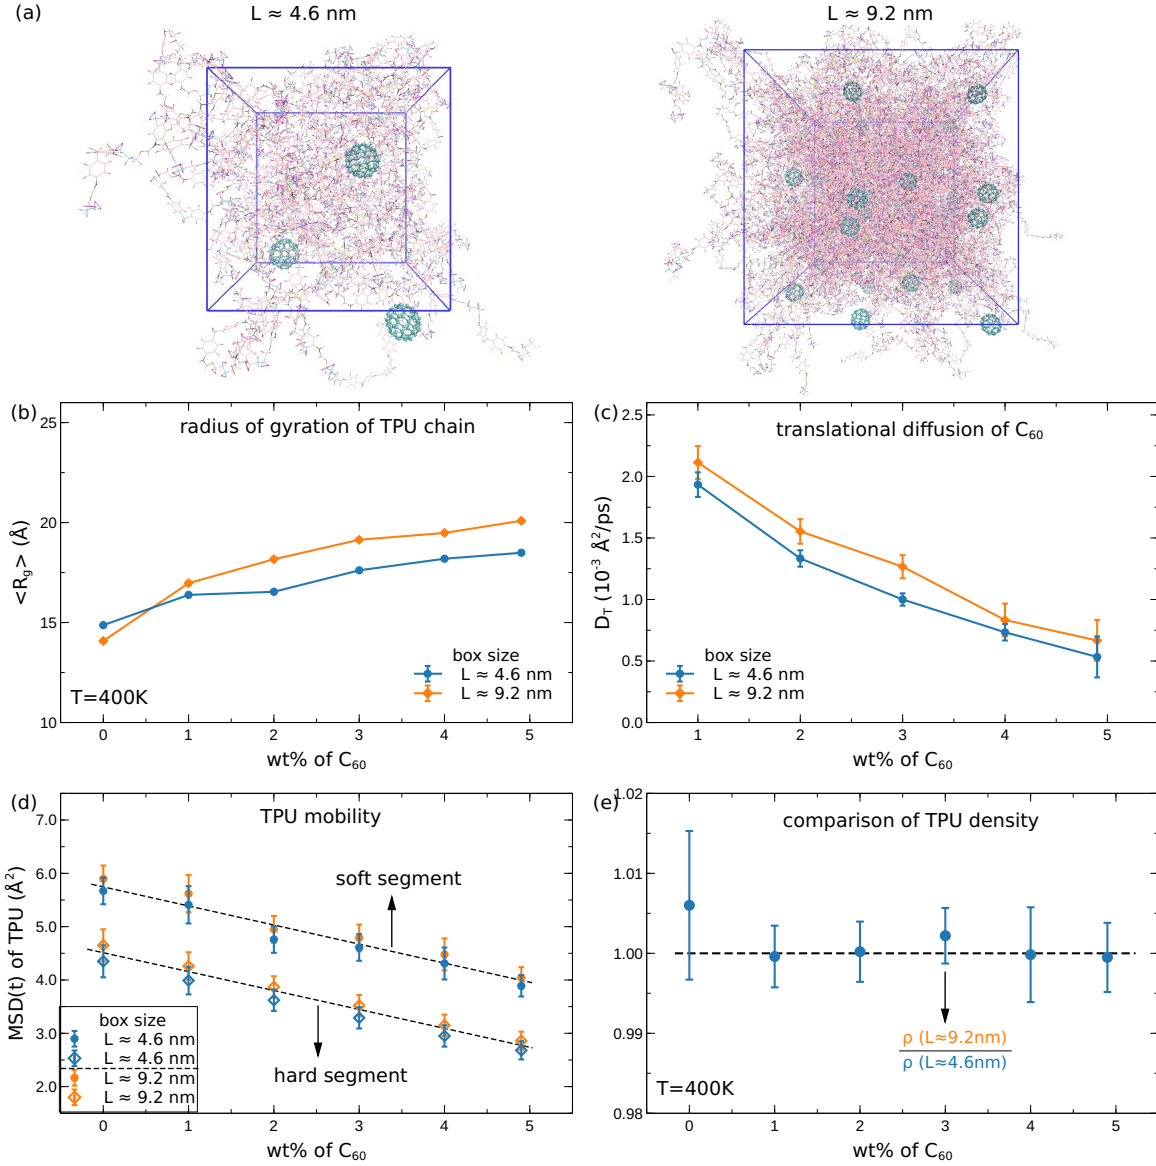

Figure S1: Finite size effect examined: (a) snapshots of simulation systems with smaller size ( $L \approx 4.6nm$ ) and larger size ( $L \approx 9.2nm$ ), (b) radius of gyration ( $\langle R_g \rangle$ ) as a function of  $C_{60}$  wt% for the smaller and larger simulation systems, (c) translational diffusion coefficient ( $D_T$ ) as a function of  $C_{60}$  wt% influenced by simulation size, (d) MSD( $t = 100ps$ ) of TPU for soft and hard segments with respect to  $C_{60}$  wt%, (e) The ratio of TPU density between the larger system ( $L \approx 9.2nm$ ) and the smaller system ( $L \approx 4.6nm$ ).

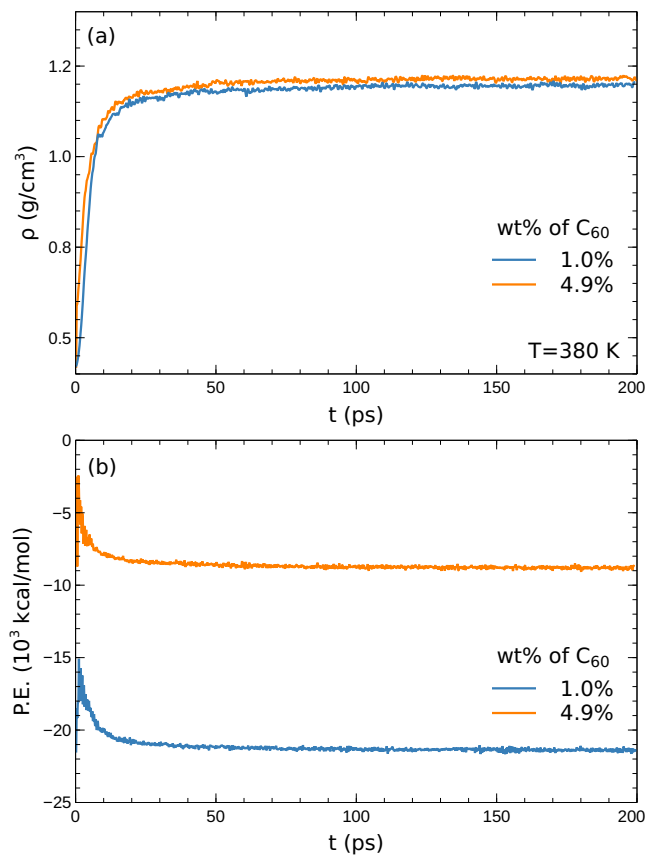

Figure S2: Changes in (a) density of TPU/C<sub>60</sub> composites and (b) potential energy during the first 200 ps of NPT run ( $P=0.1$  MPa,  $T=380$  K).

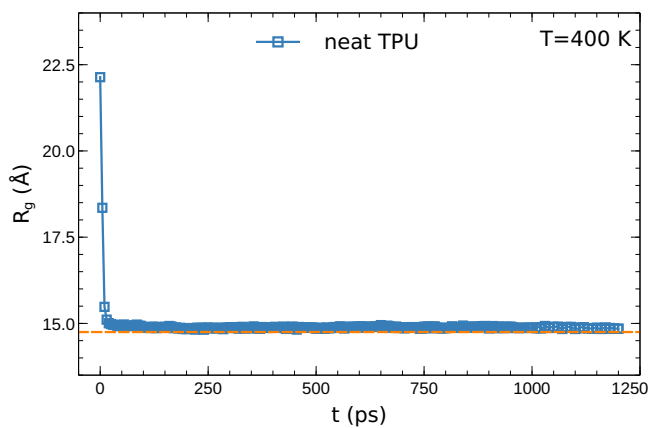

Figure S3: Radius of gyration ( $R_g$ ) of TPU chain as a function of simulation time ( $P=0.1$  MPa,  $T=400$  K). The theoretical value of  $R_g$  is given by the dashed line.

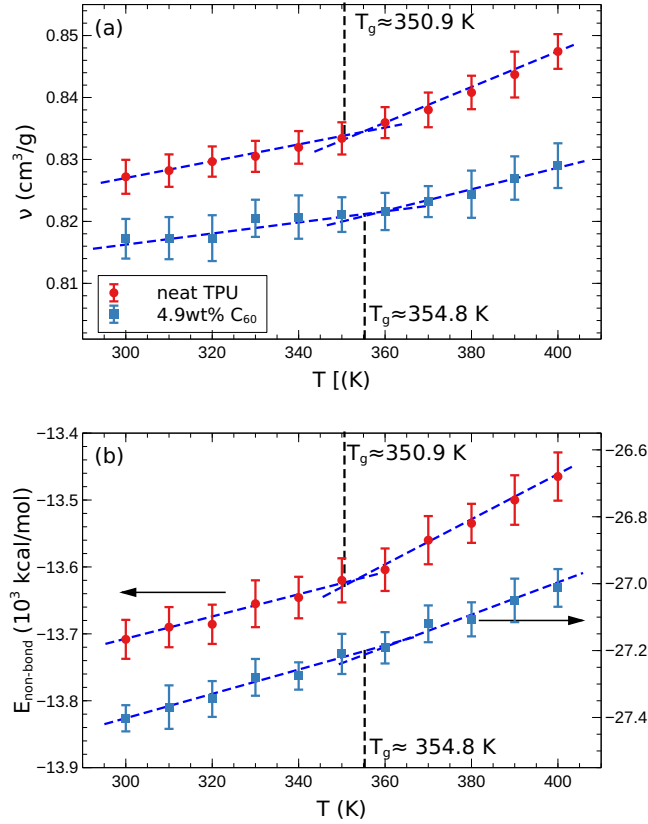

Figure S4: Determination of glass transition temperature  $T_g$  by changes in (a) specific volume ( $\nu$ ) and (b) non-bond energy ( $E_{\text{non-bond}}$ ) versus temperature ( $T$ ).

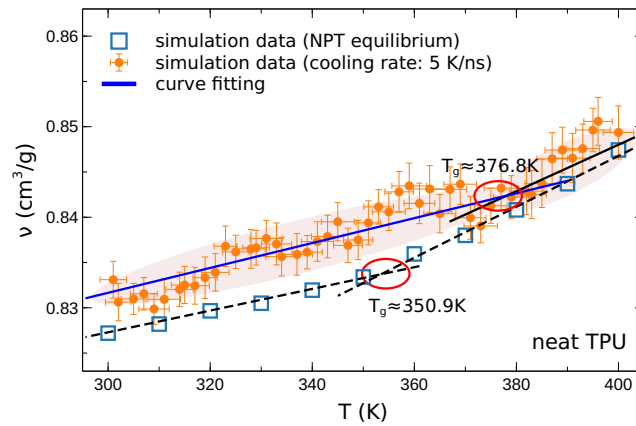

Figure S5: Specific volume ( $\nu$ ) under NPT equilibrium and during cooling, as a function of temperature ( $T$ ). Glass transition temperature ( $T_g$ ) measured using cooling is significantly higher compared to simulation technique of NPT equilibrium.

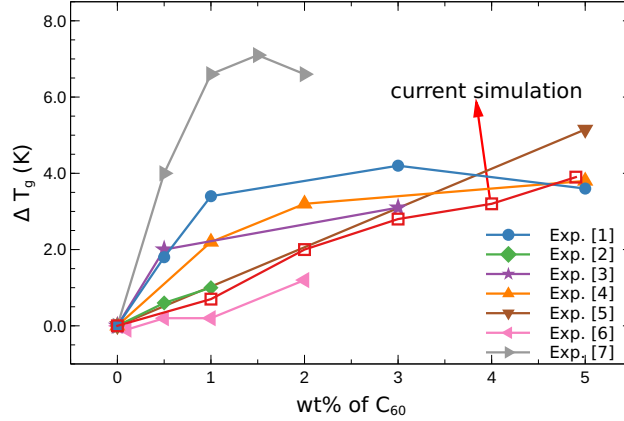

Figure S6: Comparison of glass transition temperature increment ( $\Delta T_g$ ) from current MD simulation study and literature experiments. Polymer/ $C_{60}$  composite details shown in Table S1.

Table S1: Polymer/ $C_{60}$  composite systems in literature experiments

| Index    | Polymer/ $C_{60}$ System <sup>a</sup> | Molecular Weight of Polymer | References         |
|----------|---------------------------------------|-----------------------------|--------------------|
| –        | TPU/ $C_{60}$                         | Mw=Mn=3494 g/mol            | Current Simulation |
| Exp. [1] | PMMA/ $C_{60}$                        | Mw=254.7 kg/mol             | [1] <sup>1</sup>   |
| Exp. [2] | PS/ $C_{60}$                          | Mw=152 kg/mol               | [2] <sup>2</sup>   |
| Exp. [3] | PIB/ $C_{60}$                         | Mn=25000 g/mol              | [3] <sup>3</sup>   |
| Exp. [4] | PS/ $C_{60}$                          | Mw=2.2 kg/mol               | [4] <sup>4</sup>   |
| Exp. [5] | PS/ $C_{60}$                          | Mn=2727 g/mol               | [5] <sup>5</sup>   |
| Exp. [6] | PU/ $C_{60}$                          | Mn= $\sim$ 24000 g/mol      | [6] <sup>6</sup>   |
| Exp. [7] | TPU/ $C_{60}$                         | unknown                     | [7] <sup>7</sup>   |

<sup>a</sup> polymer abbreviation: TPU - thermoplastic polyurethane; PMMA - poly(methyl methacrylate); PS – polystyrene; PIB – polyisoprene; PU – polyurethane;

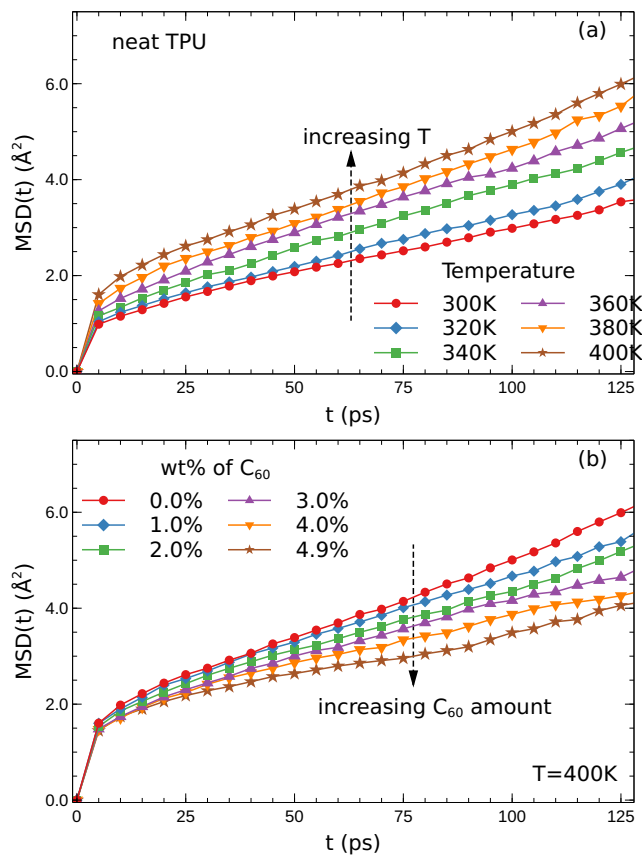

Figure S7: (a) Mean squared displacement (MSD( $t$ )) versus time  $t$  for neat TPU. (b) MSD( $t$ ) for TPUs with varying wt% of  $C_{60}$  at 400K.

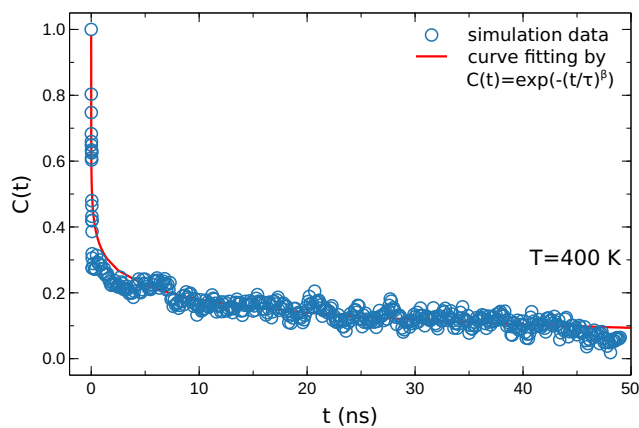

Figure S8: Time decay of orientational autocorrelation function  $C(t)$  for bond vector of simulated TPU chains ( $P=0.1\text{ MPa}$ ,  $T=400\text{ K}$ ).

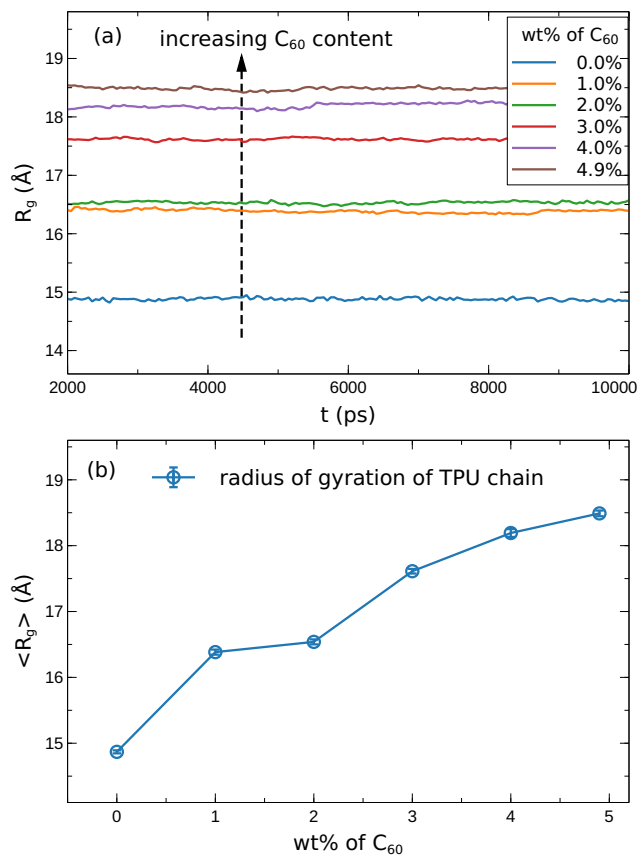

Figure S9: (a) Time dependence of radius of gyration ( $R_g$ ) of TPU chains within intermediate to long-time range. (b) Averaged radius of gyration ( $\langle R_g \rangle$ ) as a function of  $C_{60}$  wt%.



## References

- (1) Kropka, J. M.; Putz, K. W.; Pryamitsyn, V.; Ganesan, V.; Green, P. F. Origin of Dynamical Properties in PMMAC60 Nanocomposites. *Macromolecules* **2007**, *40*, 5424–5432.
- (2) Kropka, J. M.; Sakai, V. G.; Green, P. F. Local polymer dynamics in polymer-C60 mixtures. *Nano letters* **2008**, *8* 4, 1061–5.
- (3) Ding, Y.; Pawlus, S.; Sokolov, A. P.; Douglas, J. F.; Karim, A.; Soles, C. L. Dielectric Spectroscopy Investigation of Relaxation in C60Polyisoprene Nanocomposites. *Macromolecules* **2009**, *42*, 3201–3206.
- (4) Sanz, A.; Wong, H. C.; Nedoma, A. J.; Douglas, J. F.; Cabral, J. T. Influence of C60 fullerenes on the glass formation of polystyrene. *Polymer* **2015**, *68*, 47–56.
- (5) Weng, D.; Lee, H. K.; Levon, K.; Mao, J.; Scrivens, W. A.; Stephens, E. B.; Tour, J. M. The influence of Buckminsterfullerenes and their derivatives on polymer properties. *European Polymer Journal* **1999**, *35*, 867–878.
- (6) Heydarnezhad, H. R.; Mohammadi, N.; Alegría, Á. Non-Einstein Rheology in Segmented Polyurethane Nanocomposites. *Macromolecules* **2021**, *54*, 2783–2796.
- (7) Kanbur, Y.; Tayfun, Ü. Development of multifunctional polyurethane elastomer composites containing fullerene: Mechanical, damping, thermal, and flammability behaviors. *Journal of Elastomers & Plastics* **2018**, *51*, 262 – 279.
